# Supplementary material
Source: ML conference proceedings conference paper supplement (https://proceedings.neurips.cc/paper_files/paper/2025/hash/6b9628a5da76f5f1d6ec025f4b493686-Abstract.html)
Supplement: Supplementary file 1 [file 6b9628a5da76f5f1d6ec025f4b493686-Supplemental-Datasets_and_Benchmarks_Track.pdf]

# SceneSplat++: A Large Dataset and Comprehensive Benchmark for Language Gaussian Splatting

## *Supplementary Material*

This supplementary material provides additional information about the dataset, licensing, the benchmark and future research directions.

### Contents

|          |                                                |           |
|----------|------------------------------------------------|-----------|
| <b>1</b> | <b>Introduction</b>                            | <b>2</b>  |
| <b>2</b> | <b>Related Works</b>                           | <b>3</b>  |
| <b>3</b> | <b>Dataset</b>                                 | <b>4</b>  |
| 3.1      | Data Collection and Processing . . . . .       | 5         |
| 3.2      | Vision-Language Embedding Collection . . . . . | 6         |
| <b>4</b> | <b>Benchmark</b>                               | <b>6</b>  |
| 4.1      | Benchmark settings . . . . .                   | 6         |
| 4.2      | Key Insights . . . . .                         | 7         |
| <b>5</b> | <b>Conclusion and Limitations</b>              | <b>10</b> |
| <b>A</b> | <b>Dataset Collection and Processing</b>       | <b>1</b>  |
| A.1      | Details of Each Data Source . . . . .          | 1         |
| A.2      | Dataset License . . . . .                      | 2         |
| <b>B</b> | <b>Benchmark Settings</b>                      | <b>4</b>  |
| B.1      | Details of Running Benchmark Methods . . . . . | 4         |
| B.2      | Additional Benchmark Results . . . . .         | 7         |
| <b>C</b> | <b>Further Research Directions</b>             | <b>8</b>  |
| C.1      | Gaussian LLM . . . . .                         | 8         |
| C.2      | Gaussian Reasoning . . . . .                   | 9         |
| <b>D</b> | <b>Broader Impact</b>                          | <b>10</b> |

## **A Dataset Collection and Processing**

### **A.1 Details of Each Data Source**

**SceneSplat-7K.** We refer to [31] for processing details of the included ScanNet, ScanNet++, ScanNet++ v2, Replica, Hypersim, 3RScan, ARKitScenes, and Matterport3D data sources. We follow the same language label collection process as detailed in its supplementary.

**DL3DV-10K.** The DL3DV-10K [33] is a large-scale 3D vision dataset comprising 51.2 million frames from 10,510 videos captured at 65 real-world locations, featuring diverse scenes with varying

lighting, transparency, and reflections. It provides high-resolution 4K images (2160×3840 at 60 fps), which we downsample to 540×960 for training Gaussian Splatting models. Unlike other datasets, DL3DV-10K provides only RGB images and depth supervision is disabled. To address large-scale variations, we employ vanilla Gaussian Splatting without a fixed number of Gaussians, and we filter out low-quality scenes with PSNR values below 21 dB.

**HoliCity.** The dataset covers 6,253 real-world panoramas of resolution 13312×6656 that are aligned with the CAD model of downtown London with an area of more than 20 km<sup>2</sup>. We use the converted perspective images, which are equipped with pseudo depth maps estimated from the CAD map and the semantic segmentation labels. The original semantic labels are: Sky or nothing, Buildings, Roads, Terrains, Trees, Others. We map Sky or nothing and Others to the ignore label of -1 and add the vehicle and pedestrian classes in our query. Since these two classes are not present in the ground truth labels and are flattened, we map them to the terrains and roads classes respectively before calculating the metrics. The original test split does not provide the depth maps and semantic labels, we use the original validation split instead for our benchmark.

**Aria Synthetic Environments.** We follow the official documentation to undistort the RGB frames and depth maps. Devignetting is performed using the provided gain map. Because the camera frustum has a conical shape, we ignore the black border regions during 3DGS optimization. We fuse the depth maps into point clouds and apply voxel downsampling with grid size 3 cm. The threshold for the total number of Gaussians is set to be 1.5 times the number of initial points.

**Dataset Splits for Benchmark.** For our benchmark results on full evaluation scenes reported in the main paper, we use the official splits provided by each dataset, *i.e.*, ScanNet val split (312 scenes), ScanNet++ nvs\_sem\_val split (50 scenes), Matterport3D test split (370 scenes), and HoliCity val split (328 scenes). For the benchmarks on 10 selected scenes, the scenes were randomly chosen from the full evaluation scenes as detailed in Tab. A.

**Visualization.** We provide visualizations that showcase the photorealistic appearance and accurate geometry rendering reconstructions through all the different sources. See Fig. H and Fig. G.

| ScanNet      | ScanNet++  | Matterport3D   | HoliCity                   |
|--------------|------------|----------------|----------------------------|
| scene0011_00 | 09c1414f1b | 2t7WUuJeko7_02 | ytwUEEljP6RgoV0MviqvsQ_LD  |
| scene0011_01 | 0d2ee665be | 5ZKStnWn8Zo_15 | yuVpITQv74rpaWqX4kEW4Q_HD  |
| scene0153_00 | 38d58a7a31 | ARNzJeq3xxb_07 | yxYrxgMjOWCeJ3a_KyBXXKA_LD |
| scene0153_01 | 3db0a1c8f3 | fzynW3qQPVF_00 | yy03mA02i0OxVdMb9klRgg_LD  |
| scene0329_01 | 5ee7c22ba0 | jtcxE69GiFV_32 | z0IhWSN8uhWDItDqmwY8g_HD   |
| scene0329_02 | 5f99900f09 | pa4otMbVnkk_27 | z37U-BzqOo0_mSeJh7gXbg_LD  |
| scene0435_00 | a8bf42d646 | q9vSo1VnCiC_05 | z5af-sE80KZQc_9Se7Aq_g_LD  |
| scene0435_01 | a980334473 | rqfALeAoiTq_11 | z5l-XERj7c-N4Rdk4JSLeg_LD  |
| scene0578_01 | c5439f4607 | UwV83HsGsw3_22 | z8hAivfNyPaRSobbXCR8jQ_LD  |
| scene0578_02 | cc5237fd77 | wc2JMjhGNzB_11 | z9UseFv2rAwNfe21MuYxZQ_LD  |

Table A: Selected 10 Scenes for Benchmarks.

## A.2 Dataset License

Our proposed dataset construction process includes multiple existing 3D datasets, each with specific license requirements. Tab. B details the license of each component dataset.

To respect all component licenses while making our proposed dataset accessible to the research community, we employ the following approaches based on each dataset’s licensing terms:

1. **Direct distribution with attribution:** For datasets whose licenses permit redistribution under non-commercial research purposes (ARKitScenes, Hypersim, DL3DV-10K), we include the original licenses as requirements before providing our data and provide proper attribution to the original authors.
2. **Distribution after approval:** For datasets with less clear redistribution terms, we have contacted the original authors and asked for permission to redistribute our processed data. Our proposed use case does not conflict with the existing licenses.

| Dataset                     | License / Terms                                                      | Allowed Purposes                                                                                  | Redistribution                                                            | Approach |
|-----------------------------|----------------------------------------------------------------------|---------------------------------------------------------------------------------------------------|---------------------------------------------------------------------------|----------|
| ScanNet                     | ScanNet Terms of Use                                                 | Only for non-commercial research and educational purposes.                                        | No, but the authors agreed to host our GS on their website.               | 3        |
| ScanNet++                   | ScanNet++ Terms of Use                                               | Only for non-commercial research and educational purposes.                                        | No, but the authors agreed to host our GS on their website.               | 3        |
| ARKitScenes                 | Apple Software License                                               | Non-commercial, non-exclusive license; granted use, installation, modification and redistribution | Yes                                                                       | 1        |
| Hyperim                     | CC BY-SA 3.0                                                         | Free to share and adapt under the Attribution and ShareAlike terms                                | Yes                                                                       | 1        |
| 3RScan                      | 3RScan Terms of Use                                                  | Only for non-commercial research and educational purposes.                                        | Yes                                                                       | 1        |
| Matterport3D                | Matterport End User License Agreement for Academic Use of Model Data | Non-commercial academic use only.                                                                 | Yes (Required to include the Agreement, or a hyperlink to this Agreement) | 3        |
| Replica                     | Replica Dataset Research Terms                                       | Research or educational purpose that is non-commercial or not-for-profit.                         | Yes                                                                       | 1        |
| DL3DV-10K                   | DL3DV-10K Terms of Use & CC BY-NC 4.0                                | Only for non-commercial research and educational purposes.                                        | Yes                                                                       | 1        |
| HoliCity                    | HoliCity Terms of Use                                                | Non-commercial purposes.                                                                          | No, currently in active contact to reach arrangement.                     | 4        |
| Aria Synthetic Environments | Aria Synthetic Environments Dataset License Agreement                | Non-commercial research.                                                                          | No, currently in active contact to reach arrangement.                     | 4        |
| Internet Collected Data     | Polycam Terms of Service, Sketchfab License Agreement                | Cannot be used for any commercial or promotional use.                                             | No, but we offer the selected high-quality scenes with URL and SceneId.   | 4        |

Table B: **Data Source License Summary.**

- 3. Hosting through original dataset platforms:** For datasets with custom terms that restricts free redistribution (ScanNet, ScanNet++), we reach agreement with the original dataset authors and host our processed data on their official channel.
- 4. Reproduction by downloading from the original sources:** For datasets that prohibit redistribution, including any derivative works, we will not share the processed data directly. We provide the processing scripts and language label collection, so the users can process the data themselves after downloading the original datasets.

| Config                  | LangSplat[52]    | OpenGaussian [78] | Feature-3DGS [93] | FMGS [97]        | GOI [53]            |
|-------------------------|------------------|-------------------|-------------------|------------------|---------------------|
| 2D Feature Text Encoder | SAM+CLIP<br>CLIP | SAM+CLIP<br>CLIP  | LSeg<br>CLIP      | DINOv2<br>CLIP   | SAM+CLIP<br>CLIP    |
| Rasterizer Iteration    | Custom<br>30k    | 3DGS<br>70k       | Custom<br>7k      | Custom<br>32.5k  | Custom<br>1.5k      |
| Feat. Opti. Only        | ✓                | ✗                 | ✗                 | ✗                | ✓                   |
| Feature Lr              | 2.5e-3           | 2.5e-3            | 2.5e-3            | 1e-2             | 2.5e-3              |
| Feat. Compression       | Autoencoder      | N.A.              | CNN               | Hash Code        | Feature<br>Codebook |
| Feature Dim.            | 3                | 6                 | 256               | 512              | 10                  |
| Inference GPU           | A6000*1 (48G)    | A6000*1 (48G)     | A6000*1<br>(48G)  | H200*1<br>(141G) | A6000*1<br>(48G)    |

Table C: **Configurations of Per-Scene Optimization Methods.**

For the that datasets fall under the scripts-only approach, we are actively contacting the respective dataset teams to request potential hosting options.

In conclusion, our SceneSplat-49K dataset components are licensed as follows: **(1)** Language features are made available under CC BY-SA 4.0. **(2)** 3D Gaussian Splatting scenes must be used in accordance with the original license terms as detailed in Tab. B. Users must comply with all component dataset licenses when using our data. This follows similar procedures used in recent datasets such as [40].

## B Benchmark Settings

### B.1 Details of Running Benchmark Methods

The implementation details of Per-Scene optimization methods are shown in Tab. C, we provide detailed information about the vision-language models used, which fall into two main categories for feature extraction visualized in Fig. B and the zero shot segmentation performance using these features are reported in Tab. G. The tile-based method produces instance-level features by leveraging SAM-generated masks, while the LSeg-based method extracts pixel-level features using the LSeg image encoder. Additional details reported include the rasterizer employed, the number of training iterations, and whether the method is used to optimize only the features or both the features and the Gaussian primitives. We also include information on the feature compression strategy and the type of GPUs used for training. In Tab. D we report details on the selected features, the Gaussian rasterizer configuration, the dimensionality of the lifted features, and whether pruning was applied to reduce the number of Gaussians. The training details of SceneSplats across different benchmarks are provided in Tab. E.

**LangSplat.** The method first proposes tile-based splatting to learn hierarchical semantics from SAM and CLIP models as shown in Fig. A. Specifically, the approach utilizes the automatic mask generator of SAM, where mesh grid points are used as prompts. By controlling the spacing between grid points, the method generates masks corresponding to different semantic levels, including "whole," "part," and "subpart." Each masked region is then cropped, resized to 224×224 pixels with a black background, and subsequently passed through the CLIP image encoder. This design utilizes the CLIP encoder’s capacity to generate global semantic representations of input images, effectively reducing background interference while enhancing focus on the target object. To accelerate rasterization, LangSplat employs an autoencoder to project 512-dimensional CLIP features into a lower-dimensional (3-dimension) space. The autoencoder architecture consists of a 5-layer encoder with dimensions [256, 128, 64, 32, 3] and a decoder with dimensions [16, 32, 64, 128, 256, 256, 512], trained for 1,000 epochs with a learning rate of 7e-4. As shown in Tab. G, this achieves effective compression while maintaining feature quality, measured by average cosine similarity loss. For rasterization, LangSplat introduces a custom rasterizer that treats the compressed 3D features as RGB-like channels, enabling efficient processing without modifying the underlying CUDA kernel functions. In the main paper, we report the best results among the three semantic levels.

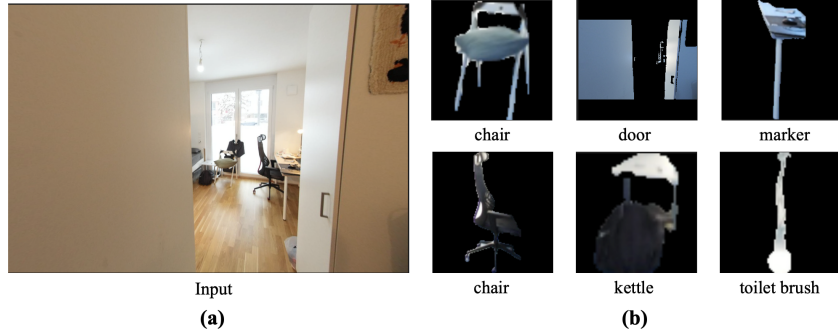

Figure A: **Illustration of Tile-Based Feature Extraction.** (a) The input frame. (b) The SAM-generated masks are cropped and resized to  $224 \times 224$ . The accompanying text shows the zero-shot prediction results for each cropped image. However, some predictions are incorrect due to imprecise object instance composition. For example, in the top-middle prediction on the right, a wall and a wardrobe together form a crop that resembles a door. Similarly, a combination of a bedside cabinet and a backpack is mistakenly predicted as a kettle. Context also plays an important role: as shown on the right, a partial view of a desk is misclassified, and a lamp is incorrectly identified as a toilet brush.

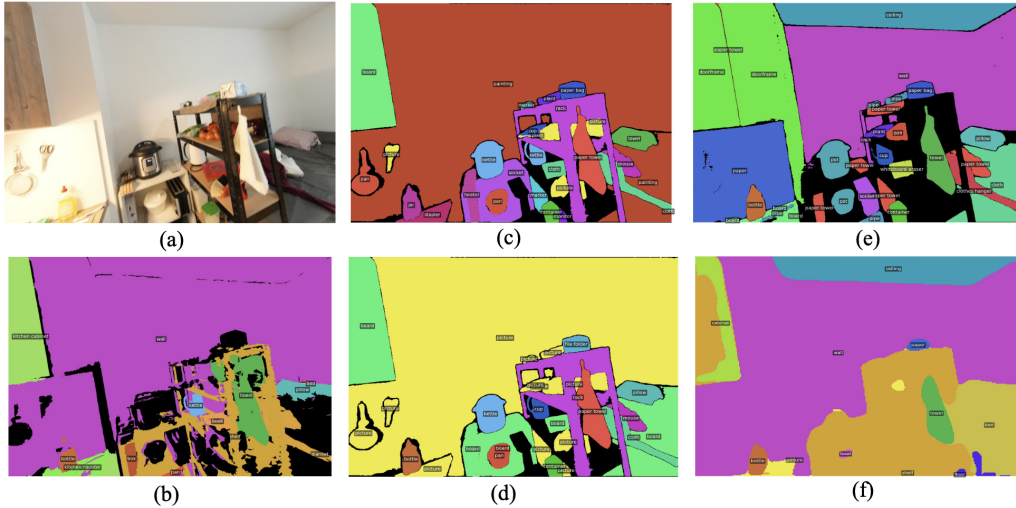

Figure B: **2D Segmentation Using Different 2D Extracted Features.** (a) Input frame, (b) Ground truth segmentation, (c) CLIP zero-shot segmentation, (d) Autoencoder-restored zero-shot segmentation, (e) SigLIP2 zero-shot segmentation, (f) LSeg zero-shot segmentation. The features above demonstrate the strengths and weaknesses of different feature extraction methods. All examples in (c), (d), and (e) use tile-based features extracted from SAM, which clearly preserve object boundaries and capture fine details in small objects, such as the kettle. In contrast, (f), which uses LSeg, treats the entire shelf as a single instance, failing to distinguish finer structural elements. Additionally, the ground truth is noisy and misses some boundary details. We also observe that the SigLIP2 model outperforms CLIP by successfully recognizing elements such as the ceiling and walls. Notably, features decoded by the autoencoder demonstrate improved instance-level understanding in some cases, potentially due to the suppression of high-frequency information.

**OpenGaussian.** The method follows LangSplat for 2D feature extraction and utilizes whole-object masks for training, employing a two-stage codebook discretization process. In the first stage, a 6D feature space is projected onto instance masks. A smoothing loss is applied to encourage feature consistency within each mask, while a contrastive loss separates features across different masks. This stage is trained for 30,000 iterations. In the second stage, continuous instance features are transformed into quantized features and indices through a coarse-to-fine codebook learning approach, which also requires 30,000 iterations. To handle occlusion, the coarse-level clustering integrates 3D spatial coordinates and applies an L1 loss to minimize discrepancies between rendered instance features and their corresponding pseudo-instance features generated from cluster centers. At the fine level, an L2 loss is applied exclusively within the object silhouette region, focusing on feature-level optimization

| Config                  | Gradient-Weighted 3DGS[20] | LUDVIG[42]         | OccamLGS[9]     | SceneSplat (PL)[31]   |
|-------------------------|----------------------------|--------------------|-----------------|-----------------------|
| 2D Feature Text Encoder | LSeg CLIP                  | DINOv2 + CLIP CLIP | SAM + CLIP CLIP | SAM + SigLIP2 SigLIP2 |
| Rasterizer              | gsplat                     | 3DGS               | Custom          | gsplat                |
| Filter                  | N.A.                       | N.A.               | ✓               | N.A.                  |
| Feature Dim.            | 512                        | 512                | 512             | 768                   |
| Prune                   | ✓                          | N.A.               | ✓               | N.A.                  |
| Inference GPU           | A6000*1 (48G)              | A6000*1 (48G)      | A6000*1 (48G)   | A6000*1 (48G)         |

Table D: **Configurations of Other Methods.**

| BenchMark     | ScanNet (val)                  | ScanNet++ (val)                | Matterport3D (test)            | HoliCity (val) |
|---------------|--------------------------------|--------------------------------|--------------------------------|----------------|
| Training set  | ScanNet++ (v2) + ScanNet + M3D | ScanNet++ (v2) + ScanNet + M3D | ScanNet++ (v2) + ScanNet + M3D | HoliCity       |
| Batch Size    | 8                              | 8                              | 8                              | 8              |
| Optimizer     | AdamW                          | AdamW                          | AdamW                          | AdamW          |
| Lr            | 0.006                          | 0.006                          | 0.006                          | 0.006          |
| Weight Decay  | 0.05                           | 0.05                           | 0.05                           | 0.05           |
| Epoch         | 400                            | 400                            | 400                            | 400            |
| Inference GPU | A6000*1 (48G)                  | A6000*1 (48G)                  | A6000*1 (48G)                  | A6000*1 (48G)  |

Table E: **Configurations of SceneSplat Method.**

for precise boundary refinement. Similarly, the rasterizer is run twice as RGB-like channels to obtain a 6-dimensional instance feature, while the official rasterizer is still used in subsequent processing.

**Feature-3DGS.** The method develops a parallel rasterizer capable of processing arbitrary-dimensional features, demonstrating its effectiveness through feature distillation using SAM and LSeg [29]. While the approach optimizes rendering for high-dimensional features similar to GSplat, processing 512-dimensional features imposes significant memory overhead. To address this, it employs a speed-optimized mode that renders only 256-dimensional features and subsequently lifts them to higher dimensions via 2D convolutional networks. All reported results are obtained by projecting these 2D features back to 3D and merging them into the 3D language field and segmentation labels. Following the original implementation, we optimize both Gaussian parameters and features for 7K iterations.

**FMGS.** The method adopts the official implementation of Foundation-Model-embedded 3D Gaussian Splatting (FMGS) [97], which augments 3DGS with a multi-resolution hash table and distills CLIP and DINO feature maps into the splats for view-consistent semantics. FMGS retrains language gaussian splatting per scene for 32.5k iterations, keeping the RGB-reconstruction and pixel-alignment distillation losses. It follows Instant-NGP [46] and queries a trainable hash grid at the Gaussian centroid, passing the returned code through a light MLP to obtain semantic embedding. This design cuts the memory footprint by two orders of magnitude while retaining view-consistent features. This method in default setting could reach around 50~80 GB GPU memory, thus all the experiments are conducted on NVIDIA H200.

**GOI.** Our approach diverges from the original paper’s modified APE [66] for pixel-level feature extraction, which requires excessive storage for large datasets. Instead, we implement the SAM and CLIP pipeline with the crop fusion strategy from [31]. We train the language feature field following GOI’s official implementation and increase the feature codebook entries to 500 in response to the increase in scene size. Rather than using the paper’s computationally intensive fine-tuning approach for relevancy scoring across our numerous scenes and classes, we employ the 3D CLIP relevancy score without fine-tuning for evaluation.

**Gradient-Weighted 3DGS.** It first performs pruning by removing Gaussians whose gradients remain above a specified threshold. It then computes the gradients of the rendered RGB attributes with zero color, which are equivalent to the alpha weights. Subsequently, 3D features are obtained as

a weighted sum of 2D features extracted by the LSeg image encoder, using the minimal LSeg implementation. This design effectively lifts 2D features into 3D space without compression, leading to strong performance. The method leverages the gsplat rasterizer for rendering.

**LUDVIG.** The method extracts and uplifts features from SAM, DINOv2, and CLIP, and evaluates them on downstream tasks of segmentation and open-vocabulary object localization. However, for the segmentation task, the method assumes that a foreground mask of the object to be segmented is provided on one reference frame, which does not correspond well with our open-vocabulary 3D evaluation setting. We thus use the 3D CLIP relevancy score returned from the method to perform zero-shot 3D semantic segmentation.

**OccamLGS.** We use the open-source implementation for our benchmark and keep the original pipeline of weighted aggregation of multi-view features. The only adaptation is that we change the 2D feature map collection process when running the SAM and CLIP models, and adopt the crop fusion strategy as in [31], which we find beneficial for encoding complex scenes.

**SceneSplat.** We extend the training dataset of SceneSplat [31] to ScanNet, ScanNet++, and Matterport3D, in a total of 3,503 scenes, and report the results from this joint training on all the indoor benchmarks. The results on the HoliCity benchmark are reported using the model trained only on this dataset. The hyperparameters used are the same as in the original method, except we decrease the data epochs from 800 to 400 for the joint training.

**Text Prompts for Benchmark.** For all the indoor benchmarks on zero-shot 3D semantic-segmentation, we generate text prompts with the fixed template "this is a/an <class name>". For the HoliCity benchmark, we use the following texts:

```
this is a building or other construction
this is a road or street
this is terrain or ground near a road
this is part of a tree or plant
this is a car or vehicle
this is a pedestrian
```

## B.2 Additional Benchmark Results

**Comparison of CLIP and SigLIP2 Feature.** Tab. F provides the baseline benchmark results when using the same SigLIP2 features. LUDVIG shows a relative improvement of 34.6%, 50.5%, and 13.1% in f-mIoU across ScanNet++, ScanNet200, and Matterport3D benchmarks, and OccamLGS observes more improvements, which gains 54.7%, 89.4%, and 59.3% in f-mIoU respectively. However, the generalizable method SceneSplat still outperforms both baselines when all use SigLIP2 features. The comparison of zero-shot performance on 2D tasks using CLIP and SigLIP2 features is presented in Tab. G, with qualitative results shown in Fig. B.

| Method     | Features | ScanNet++     |               | ScanNet200    |               | Matterport3D  |               |
|------------|----------|---------------|---------------|---------------|---------------|---------------|---------------|
|            |          | f-mIoU        | f-mAcc        | f-mIoU        | f-mAcc        | f-mIoU        | f-mAcc        |
| LUDVIG     | CLIP     | 0.1099        | 0.2547        | 0.0602        | 0.1701        | 0.1960        | 0.3738        |
|            | SigLIP2  | 0.1479        | 0.2958        | 0.0906        | 0.2008        | 0.2217        | 0.3909        |
| OccamLGS   | CLIP     | 0.1502        | 0.3312        | 0.1204        | 0.2503        | 0.1725        | 0.3151        |
|            | SigLIP2  | 0.2324        | 0.4155        | <b>0.2280</b> | 0.3590        | 0.2748        | 0.4384        |
| SceneSplat | SigLIP2  | <b>0.2836</b> | <b>0.4992</b> | 0.2140        | <b>0.3874</b> | <b>0.3384</b> | <b>0.5745</b> |

Table F: **Baseline Methods Performance with CLIP vs. SigLIP2 Features.** When equipped with the same SigLIP2 features, the baseline methods in general do not reach the performance of the generalizable method.

**Zero-Shot 3D Outdoor Segmentation on KITTI-360 [32] Dataset.** To evaluate the methods' performance in complex outdoor environments, we extend the experiments on KITTI-360 [32] Dataset, which has 37 semantic classes compared to 4 classes in HoliCity. All methods are evaluated on a 16-scene mini-validation set, as shown in Tab. H. We observe that most methods are unable to effectively process large-scale scenes containing over 10 million Gaussians. Therefore, we divide

| Features  | SAM+CLIP |        | SAM+AE-CLIP |        |        | SAM+CLIP-Fuse |        | SAM+SigLIP2   |               | LSeg   |        |
|-----------|----------|--------|-------------|--------|--------|---------------|--------|---------------|---------------|--------|--------|
|           | f-mIoU   | f-mAcc | f-mIoU      | f-mAcc | Cosine | f-mIoU        | f-mAcc | f-mIoU        | f-mAcc        | f-mIoU | f-mAcc |
| ScanNet++ | 0.1051   | 0.2542 | 0.1328      | 0.2086 | 0.2022 | 0.0873        | 0.2264 | <b>0.1341</b> | <b>0.3504</b> | 0.1265 | 0.2554 |
| HoliCity  | 0.1233   | 0.2353 | 0.1377      | 0.2605 | 0.1644 | 0.0988        | 0.1177 | <b>0.2104</b> | <b>0.3658</b> | 0.1040 | 0.2751 |

Table G: **2D Zero-Shot Segmentation Results Using Different 2D Extracted Features on ScanNet++ (10 scenes) and HoliCity (10 scenes)**. Reported f-mIoU / f-mAcc for indoor datasets and mIoU / mAcc for HoliCity. The above features **SAM+CLIP** combines whole level SAM masks with the CLIP encoder as in LangSplat; **SAM+AE+CLIP** compresses the prior features into a 3-dimensional latent space using an autoencoder and reconstructs them. The reconstruction error is evaluated using cosine similarity; **SAM+CLIP+Fuse** introduces dynamic feature weighting following the method proposed in [31]; **SAM+SigLIP2** leverages 2D features from SceneSplat (pseudo labels), incorporating both dynamic weighting and SigLIP2 features; and **LSeg** extracts pixel-level features using the LSeg image encoder.

each scene into  $50m \times 50m$  chunks. Under this setting, Feature-3DGS and Gradient-Weighted 3DGS achieve significantly better results compared to other methods. This performance gap likely stems from differences in 2D feature encoding: both well-performing methods employ LSeg [30], which is specifically pretrained on large-scale outdoor data and excels in outdoor scenes. In contrast, the under performing methods rely on SAM-tiles-based features, which appear less effective in this setting. This trend is also observed in the Holicity experiments. Additionally, Feature-3DGS performs worse than Gradient-Weighted 3DGS, possibly due to its use of low-dimensional feature compression, which may lose discriminative detail compared to gradient-weighted aggregation.

Even though Feature-3DGS and Gradient-Weighted 3DGS performance stands out in complex outdoor settings, they do not stand out in indoor scenes because LSeg’s patch-wise ViT encoding struggles to preserve fine object boundaries and small objects. While the data-driven method SceneSplat was trained exclusively on indoor data, our evaluation demonstrates its ability to generalize to outdoor scenes, although extending its training data is vital to improve the outdoor performance.

| Method                                     | mIoU          | mAcc          |
|--------------------------------------------|---------------|---------------|
| <i>Per-Scene Optimization Methods</i>      |               |               |
| LangSplat [52]                             | 0.0340        | 0.0873        |
| OpenGaussian [78]                          | 0.0360        | 0.0655        |
| Feature-3DGS [93]                          | 0.0691        | 0.0427        |
| FMGS [97]                                  | 0.0020        | 0.0020        |
| GOI [53]                                   | 0.0265        | 0.0538        |
| <i>Per-Scene Optimization-Free Methods</i> |               |               |
| Gradient-Weighted 3DGS [20]                | <b>0.2042</b> | <b>0.2751</b> |
| LUDVIG [42]                                | 0.0410        | 0.0912        |
| OccamLGS [9]                               | 0.0962        | 0.1505        |
| <i>Generalizable Method</i>                |               |               |
| SceneSplat [31]                            | 0.0330        | 0.0494        |

Table H: **Zero-Shot 3D Outdoor Segmentation on KITTI-360 [32] Dataset**. All methods are evaluated on a randomly selected 16-scene mini-validation set. The metrics exclude the following classes: sky, unknown construction, unknown vehicle, unknown object.

**Qualitative Visualizations.** See more qualitative examples of zero-shot 3D semantic segmentation for the benchmark methods in Fig. C, Fig. D, and text query results in Fig. E and Fig. F. SceneSplats accurately predicts the cloth behind the chair, which is not labeled in the ground truth. In query experiments, the tile-based feature splatting method successfully detects the hanger in the corner, while the LSeg-based method fails.

## C Further Research Directions

### C.1 Gaussian LLM

A promising direction is a framework that integrates 3D Gaussian Splatting with large language models to enable more complex natural language interactions. Building upon the success of generalizable

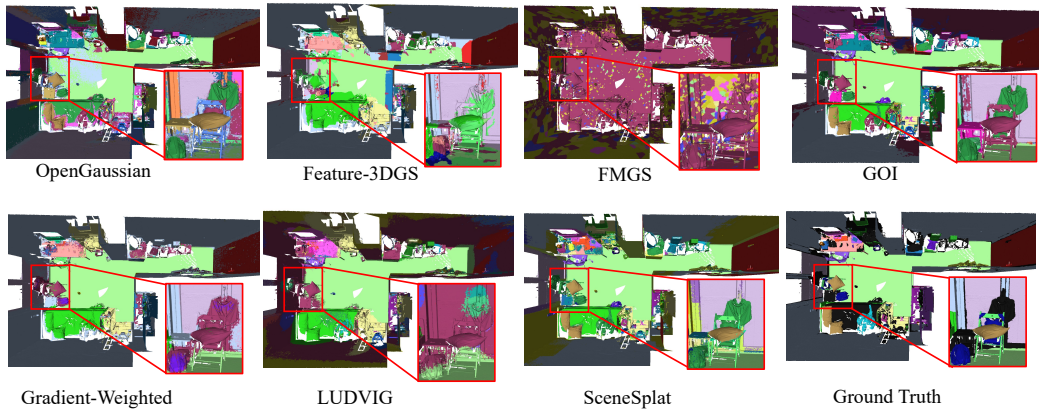

Figure C: **Qualitative Results of Zero-Shot 3D Semantic Segmentation on ScanNet++.** The semantic classes "chair" and "pants" are highlighted, which are not fully labeled in Ground Truth. (Zoom in to check details.)

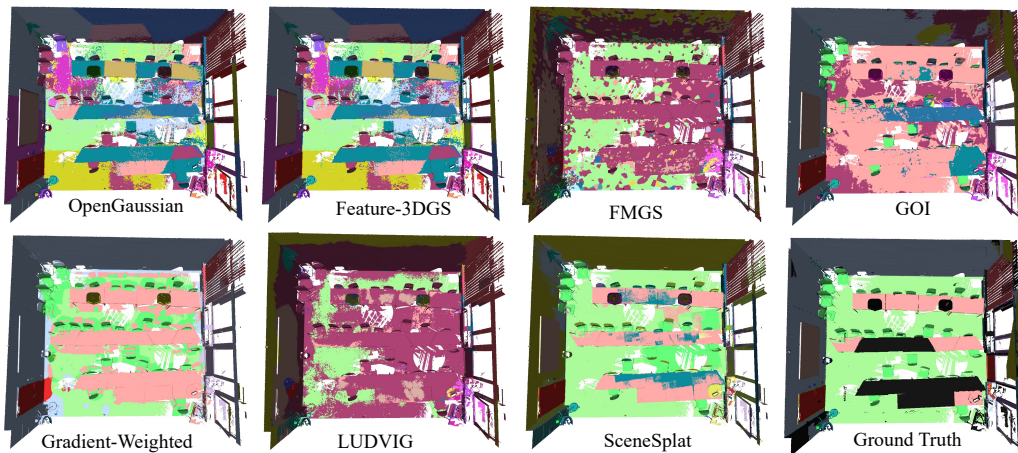

Figure D: **Qualitative Results of Zero-Shot 3D Semantic Segmentation on ScanNet++.** (Zoom in to check details.)

3DGS models demonstrated in our benchmark, Gaussian-LLM could encode 3D scenes as collections of Gaussian primitives with associated features, which are then projected into a language model’s embedding space through a specialized adapter. This approach would surpass existing work on a single object level [81] and leverage the inherent advantages of 3DGS—efficient representation, high visual fidelity, and explicit geometry—while harnessing the reasoning capabilities of LLMs for tasks such as spatial relationship understanding, scene description, and multimodal question answering. Moreover, Gaussian-LLM could benefit from training on our SceneSplat-49K dataset of diverse indoor and outdoor scenes.

## C.2 Gaussian Reasoning

Beyond language alignment, another promising frontier is Gaussian-based visual reasoning, which extends traditional point cloud reasoning paradigms into a richer, multimodal paradigm. Unlike point clouds that primarily encode geometric structure, 3D Gaussian Splatting provides both fine-grained texture and appearance in addition to geometry—enabling higher-level understanding tasks such as reading text on surfaces, recognizing affordances, or identifying visual semantics that pure geometry cannot capture. This opens a pathway to scene-level reasoning grounded in full visual context, a capability that point-based representations fundamentally lack. Moreover, reinforcement learning

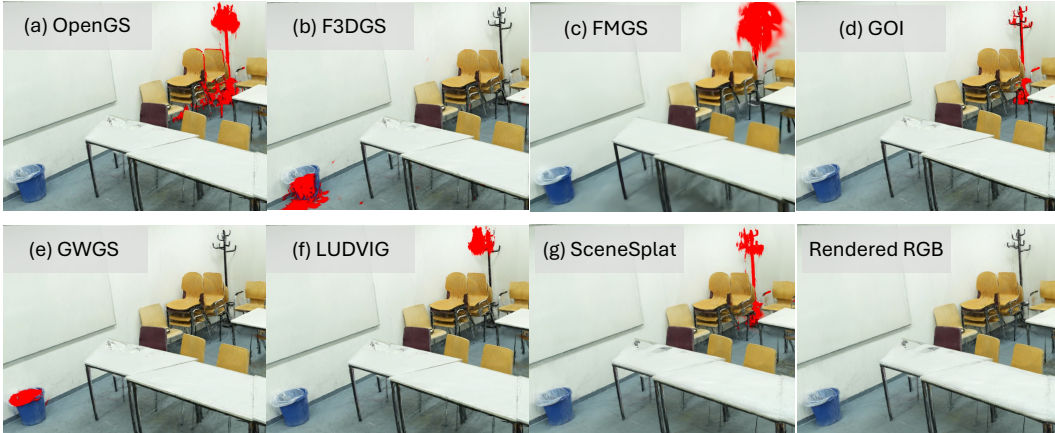

Figure E: **Text-Based Scene Query.** Given the prompt "This is a hanger." to different LGS methods, the queried parts are highlighted in red.

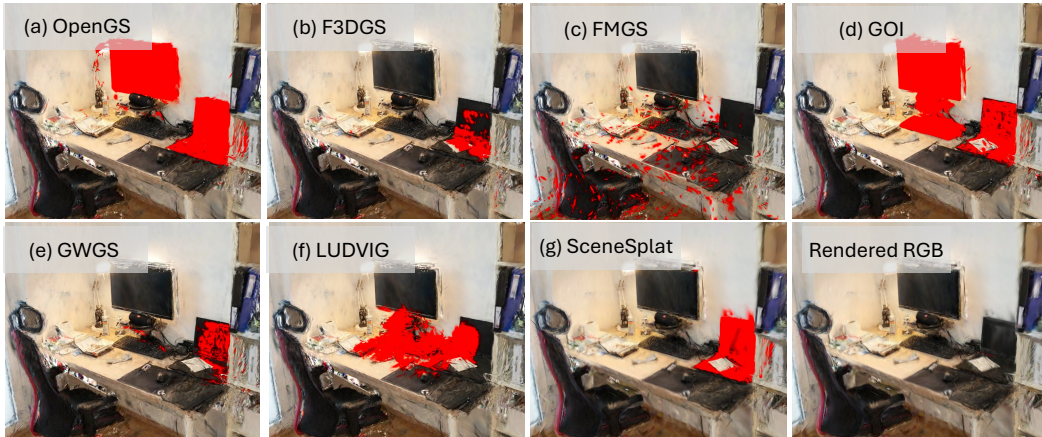

Figure F: **Text-Based Scene Query.** Given the prompt "This is a laptop." to different LGS methods, the queried parts are highlighted in red.

(RL)-based approaches could be integrated to exploit the active and interactive nature of 3DGS environments—learning to reason not just over static inputs, but over dynamic tasks that evolve through interaction (*e.g.*, navigation, embodied QA, or interactive captioning).

## D Broader Impact

While our work on introducing a large-scale Gaussian dataset for 3D tasks represents a significant advancement in 3D representation learning, it is important to consider potential societal impacts. First, since our dataset is built upon existing public datasets, it shares similar privacy risks, including the potential for unintentional inclusion of identifiable individuals or sensitive scenes. Second, the dataset is currently focused on open-vocabulary tasks while more potential annotation can be added. Third, training large-scale Gaussian Splatting models requires considerable computational resources, leading to high energy consumption and a larger carbon footprint—an increasingly important concern as AI models continue to scale.

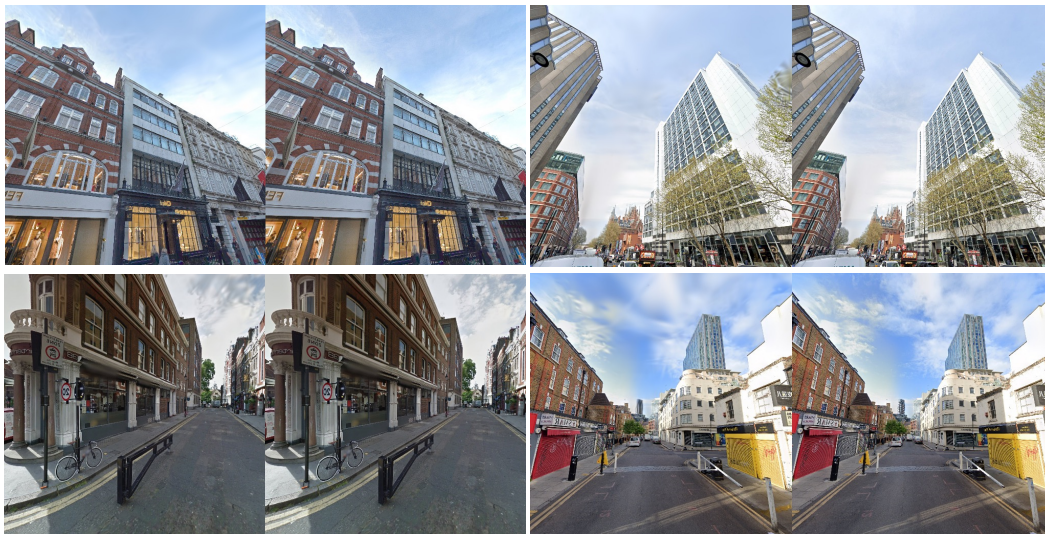

Figure G: **Renderings From Outdoor Gaussian Splatting Scenes (HoliCity).** (Left) Gaussian Splats Render Result and (right) Ground Truth.

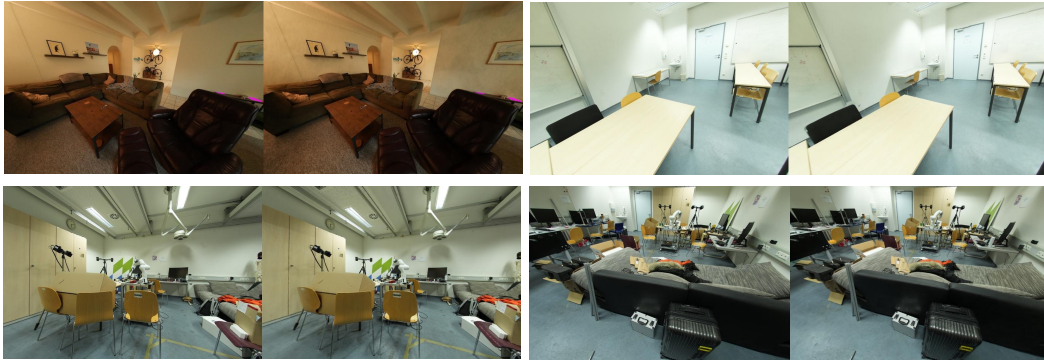

(a) Scannetpp GS. (left) Ground Truth and (right) Gaussian Splats Render Result.

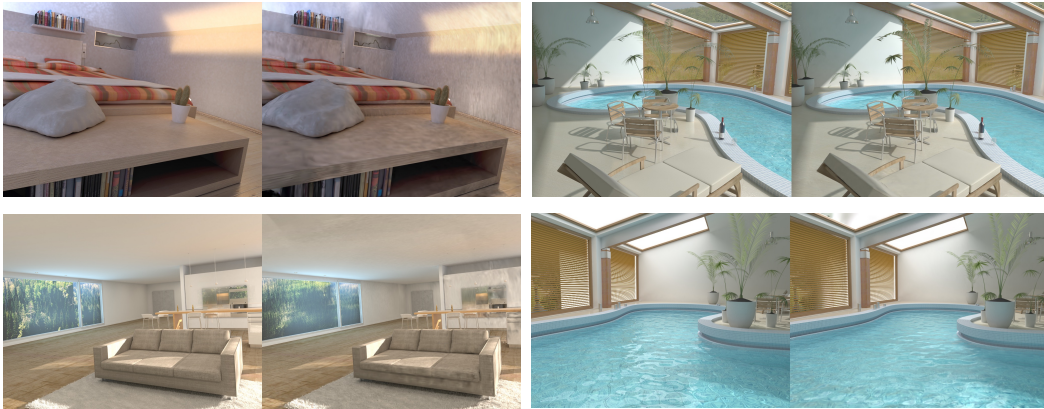

(b) Hypersim GS. (left) Ground Truth and (right) Gaussian Splats Render Result.

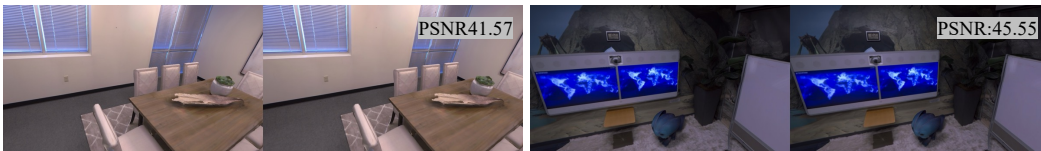

(c) Replica GS. (left) Ground Truth and (right) Gaussian Splats Render Result.

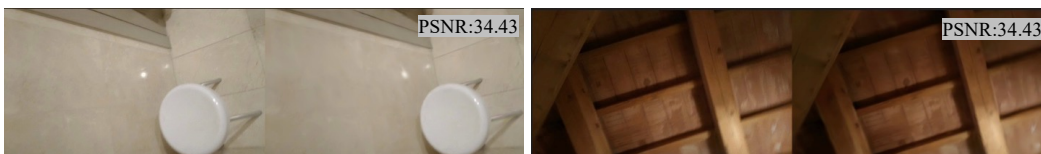

(d) 3RScan GS. (left) Ground Truth and (right) Gaussian Splats Render Result.

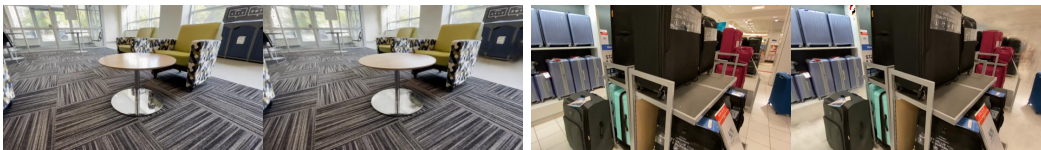

(e) DL3DV-10K GS. (left) Ground Truth and (right) Gaussian Splats Render Result.

Figure H: **Renderings From Indoor Gaussian Splatting Scenes.** The results showcase the photorealistic appearance reconstructions.
